# Supplementary material
Source: PubMed Central journal article supplement (PMC5540052)
Supplement: jamainternmed-177-838-s001.pdf [file jamainternmed-177-838-s001.pdf]

## Supplementary Online Content

Mafi JN, Wee CC, Davis RB, Landon BE. Association of primary care practice location and ownership with the provision of low-value care in the United States. *JAMA Intern Med*. Published online April 10, 2017.  
doi:10.1001/jamainternmed.2017.0410

**eTable 1.** Multivariable Adjusted\* PCP vs. non-PCP Visit Utilization Rates by Practice Setting Before the Survey Wording Change, 1997-2006 (%)

**eTable 2.** Multivariable Adjusted\* PCP vs. non-PCP Visit Utilization Rates by Practice Setting After the Survey Wording Change, 2007-2011 (%)

**eTable 3.** Multivariable Adjusted\* PCP vs. non-PCP Visit Utilization Rates by Practice Setting Among Established Patients Only, 1997-2011 (%)

**eTable 4.** Comorbidities\* Stratified by Practice Location, 2005-2011 (%)

**eTable 5.** Unadjusted Utilization Time-Trends\* Among Hospital-Based Practices vs. Community-Based Practices, 1997-2011

This supplementary material has been provided by the authors to give readers additional information about their work.

**eTable 1.** Multivariable Adjusted\* PCP vs. non-PCP Visit Utilization Rates by Practice Setting Before the Survey Wording Change, 1997-2006 (%)

|                     | Community-Based Practice (ref)<br>PCP n= 5,146<br>Non-PCP n=1,188 | Hospital-Based Practice<br>PCP n=5,536<br>Non-PCP n=6,456 | aOR              |
|---------------------|-------------------------------------------------------------------|-----------------------------------------------------------|------------------|
| Antibiotics         |                                                                   |                                                           |                  |
| PCP                 | 48.0                                                              | 43.3                                                      | 0.83 [0.66-1.03] |
| Non-PCP             | 51.5                                                              | 55.4                                                      | 1.17 [0.82-1.68] |
| CT/MRI              |                                                                   |                                                           |                  |
| PCP                 | 5.4                                                               | 6.6                                                       | 1.24 [0.91-1.68] |
| Non-PCP             | 2.8                                                               | 6.2                                                       | 2.25 [1.28-3.95] |
| X-Ray               |                                                                   |                                                           |                  |
| PCP                 | 9.4                                                               | 10.7                                                      | 1.16 [0.94-1.43] |
| Non-PCP             | 8.4                                                               | 11.9                                                      | 1.47 [1.03-2.10] |
| Specialty Referrals |                                                                   |                                                           |                  |
| PCP                 | 5.7                                                               | 6.8                                                       | 1.20 [0.89-1.61] |
| Non-PCP             | 3.9                                                               | 20.1                                                      | 6.18 [4.11-9.29] |

PCP = primary care provider; aOR = adjusted odds ratio

In 2007 the NHAMCS survey changed the question, *“are you the patient’s primary care physician/provider?”* to *“is this clinic the patient’s primary care provider?”*

\*Models adjusted for age, sex, race/ethnicity, insurance status, symptom acuity comorbidities, geographic region, and urban location.

**eTable 2.** Multivariable Adjusted\* PCP vs. non-PCP Visit Utilization Rates by Practice Setting After the Survey Wording Change, 2007-2011 (%)

|                     | Community-Based Practice (ref)<br>PCP n=2,767<br>Non-PCP n=682 | Hospital-Based Practice<br>PCP n=2,421<br>Non-PCP n=1,893 | aOR              |
|---------------------|----------------------------------------------------------------|-----------------------------------------------------------|------------------|
| Antibiotics         |                                                                |                                                           |                  |
| PCP                 | 51.1                                                           | 49.1                                                      | 0.92 [0.66-1.28] |
| Non-PCP             | 48.5                                                           | 53.5                                                      | 1.22 [0.76-1.96] |
| CT/MRI              |                                                                |                                                           |                  |
| PCP                 | 7.6                                                            | 8.6                                                       | 1.14 [0.73-1.77] |
| Non-PCP             | 5.3                                                            | 11.6                                                      | 2.36 [1.18-4.70] |
| X-Ray               |                                                                |                                                           |                  |
| PCP                 | 10.1                                                           | 12.3                                                      | 1.25 [0.87-1.80] |
| Non-PCP             | 8.1                                                            | 16.5                                                      | 2.24 [1.16-4.32] |
| Specialty Referrals |                                                                |                                                           |                  |
| PCP                 | 10.8                                                           | 14.8                                                      | 1.44 [1.07-1.94] |
| Non-PCP             | 8.5                                                            | 34.0                                                      | 5.53 [3.48-8.78] |

PCP = primary care provider; aOR = adjusted odds ratio

In 2007 the NHAMCS survey changed the question, “are you the patient’s primary care physician/provider?” to “is this clinic the patient’s primary care provider?”

\*Models adjusted for age, sex, race/ethnicity, insurance status, symptom acuity comorbidities, geographic region, and urban location.

**eTable 3.** Multivariable Adjusted\* PCP vs. non-PCP Visit Utilization Rates by Practice Setting Among Established Patients Only, 1997-2011 (%)

|                     | Community-Based Practice (ref)<br>PCP n=7,530<br>Non-PCP n=1,363 | Hospital-Based Practice<br>PCP n=7,487<br>Non-PCP n=5,455 | aOR              |
|---------------------|------------------------------------------------------------------|-----------------------------------------------------------|------------------|
| Antibiotics         |                                                                  |                                                           |                  |
| PCP                 | 49.0                                                             | 45.7                                                      | 0.88 [0.72-1.07] |
| Non-PCP             | 47.9                                                             | 56.0                                                      | 1.38 [0.98-1.95] |
| CT/MRI              |                                                                  |                                                           |                  |
| PCP                 | 6.8                                                              | 9.0                                                       | 1.21 [0.92-1.59] |
| Non-PCP             | 3.3                                                              | 8.3                                                       | 2.64 [1.57-4.42] |
| X-Ray               |                                                                  |                                                           |                  |
| PCP                 | 10.0                                                             | 12.8                                                      | 1.22 [0.99-1.50] |
| Non-PCP             | 6.3                                                              | 12.1                                                      | 2.05 [1.44-2.91] |
| Specialty Referrals |                                                                  |                                                           |                  |
| PCP                 | 7.4                                                              | 9.2                                                       | 1.27 [1.02-1.59] |
| Non-PCP             | 5.0                                                              | 26.8                                                      | 6.92 [4.98-9.61] |

PCP = primary care provider; aOR = adjusted odds ratio

\*Models adjusted for age, sex, race/ethnicity, insurance status, symptom acuity comorbidities, geographic region, and urban location.

**eTable 4.** Comorbidities\* Stratified by Practice Location, 2005-2011 (%)

|                          | Community-<br>Based Practice<br>(n=4,791) (ref) | Hospital-Based<br>Practices<br>(n=6,515) | P-value     |
|--------------------------|-------------------------------------------------|------------------------------------------|-------------|
| Arthritis                | <b>17.3</b>                                     | <b>12.5</b>                              | <b>.001</b> |
| Asthma                   | <b>6.8</b>                                      | <b>8.6</b>                               | <b>.02</b>  |
| Cancer                   | 2.5                                             | 2.5                                      | .97         |
| Cerebrovascular Disease  | 1.3                                             | 0.69                                     | .02         |
| Congestive Heart Failure | <b>0.30</b>                                     | <b>0.25</b>                              | <b>.20</b>  |
| Chronic Renal Failure    | 0.94                                            | 0.58                                     | .13         |
| COPD                     | 3.6                                             | 3.4                                      | .26         |
| Depression               | <b>12.6</b>                                     | <b>13.7</b>                              | <b>.48</b>  |
| Diabetes                 | 3.5                                             | 3.2                                      | .16         |
| Hyperlipidemia           | <b>19.0</b>                                     | <b>14.0</b>                              | <b>.005</b> |
| Hypertension             | 29.0                                            | 25.0                                     | .05         |
| Ischemic Heart Disease   | <b>2.5</b>                                      | <b>1.3</b>                               | <b>.002</b> |
| Obesity                  | <b>10.0</b>                                     | <b>8.5</b>                               | <b>.16</b>  |
| Osteoporosis             | 3.1                                             | 2.4                                      | .24         |

COPD = Chronic obstructive pulmonary disease

\*Chart-verified comorbidity data is available between 2005-2011 in NHAMCS and between 2005-2013 in NAMCS.

**eTable 5.** Unadjusted Utilization Time-Trends\* Among Hospital-Based Practices vs. Community-Based Practices, 1997-2011

| Year                       | 1997-1998 | 1999-2000 | 2001-2002 | 2003-2004 | 2005-2006 | 2007-2008 | 2009-2010 | 2011 | P-Value for Trend |
|----------------------------|-----------|-----------|-----------|-----------|-----------|-----------|-----------|------|-------------------|
| <b>Antibiotics</b>         |           |           |           |           |           |           |           |      |                   |
| Offices %                  | 46.5      | 41.5      | 49.1      | 53.3      | 51.5      | 51.1      | 49.4      | 51.6 | .100              |
| Offices n                  | 467       | 450       | 410       | 412       | 472       | 493       | 472       | 213  |                   |
| Hospitals %                | 50.3      | 45.8      | 50.0      | 49.2      | 60.1      | 47.3      | 54.6      | 65.2 | .050              |
| Hospitals n                | 996       | 1037      | 869       | 798       | 857       | 639       | 589       | 238  |                   |
| <b>CT/MRI</b>              |           |           |           |           |           |           |           |      |                   |
| Offices %                  | 4.3       | 5.8       | 5.3       | 4.7       | 6.8       | 9.2       | 7.5       | 5.9  | .003              |
| Offices n                  | 784       | 775       | 814       | 878       | 902       | 922       | 963       | 405  |                   |
| Hospitals %                | 4.8       | 4.3       | 6.1       | 8.4       | 10.3      | 10.3      | 11.2      | 9.7  | <.001             |
| Hospitals n                | 1618      | 1621      | 1434      | 1454      | 1353      | 1160      | 1240      | 466  |                   |
| <b>X-Ray</b>               |           |           |           |           |           |           |           |      |                   |
| Offices %                  | 11.0      | 10.3      | 8.1       | 8.3       | 10.6      | 11.6      | 9.0       | 10.7 | .88               |
| Offices n                  | 1028      | 1012      | 999       | 1057      | 1140      | 1173      | 1175      | 539  |                   |
| Hospitals %                | 13.1      | 11.5      | 10.6      | 11.3      | 12.3      | 12.2      | 17.1      | 17.2 | .081              |
| Hospitals n                | 2107      | 2203      | 1867      | 1834      | 1857      | 1481      | 1526      | 576  |                   |
| <b>Specialty Referrals</b> |           |           |           |           |           |           |           |      |                   |
| Offices %                  | NA        | 5.3       | 8.3       | 8.2       | 8.1       | 10.3      | 11.0      | 9.8  | <.001             |
| Offices n                  | 1243      | 1222      | 1217      | 1283      | 1369      | 1406      | 1430      | 613  |                   |
| Hospitals %                | NA        | 15.5      | 16.4      | 20.8      | 24.3      | 24.9      | 22.5      | 24.5 | <.001             |
| Hospitals n                | 2609      | 2653      | 2292      | 2237      | 2201      | 1792      | 1822      | 700  |                   |

\*Percentages may not match the value of the numerator divided by the denominator because percentages are population weighted. In addition, the referral variable did not appear in the NAMCS and NHAMCS survey instrument until 1999.
